# Supplementary material
Source: MDPI journal article supplement (https://www.mdpi.com/2227-9717/11/1/217)
Supplement: s1 [file s1]

## Supplementary Files

### Calibration Curves for PFOA

- NMR

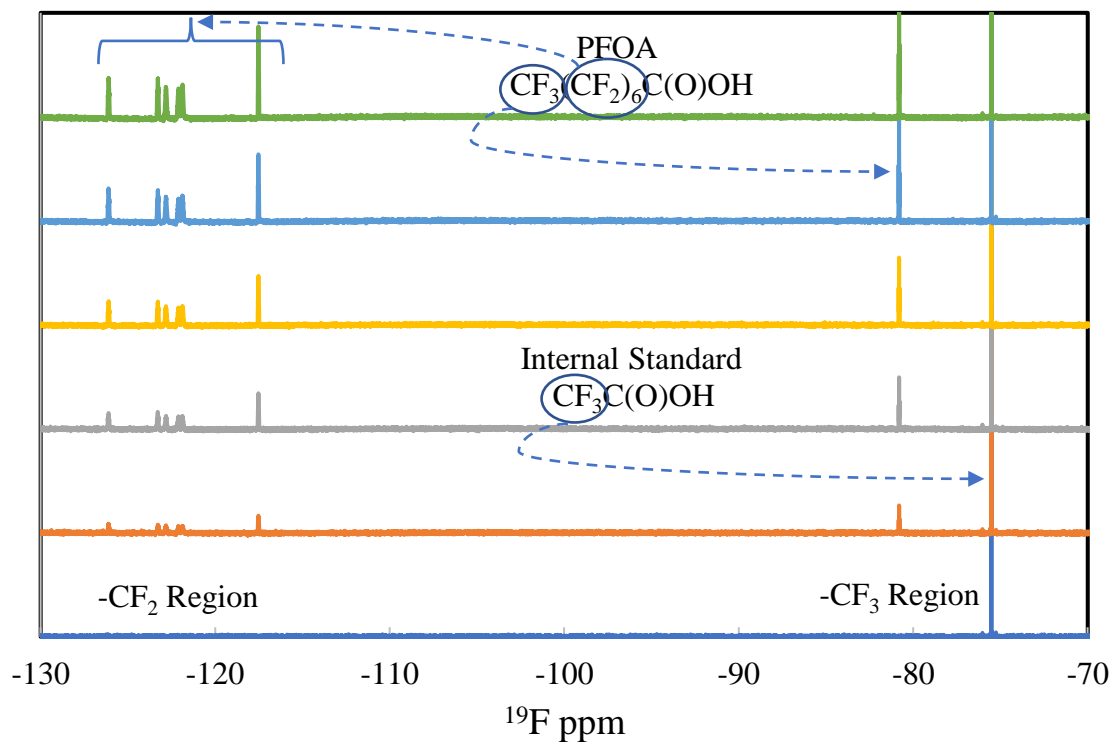

Figure S1. NMR analyses of PFOA. Based upon article [S1].

[S1]. Heerah K, Wacławek S, Konzuk J, Longstaffe JG. Benchtop  $^{19}\text{F}$  NMR spectroscopy as a practical tool for testing of remedial technologies for the degradation of perfluorooctanoic acid, a persistent organic pollutant. *Magn Reson Chem*. 2020;58:1160–1167. <https://doi.org/10.1002/mrc.5005HEERAHET AL.1167>

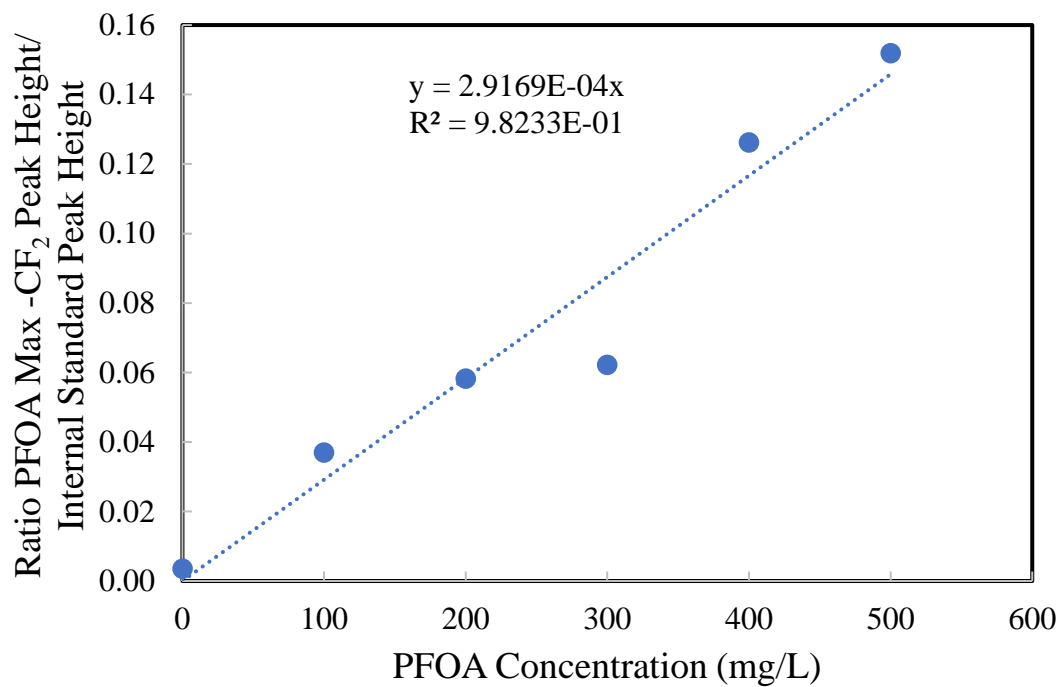

Figure S2. Calibration curve for PFOA using NMR and an internal standard, trifluoroacetic acid.

Calibration curve for PFOA in aqueous samples.

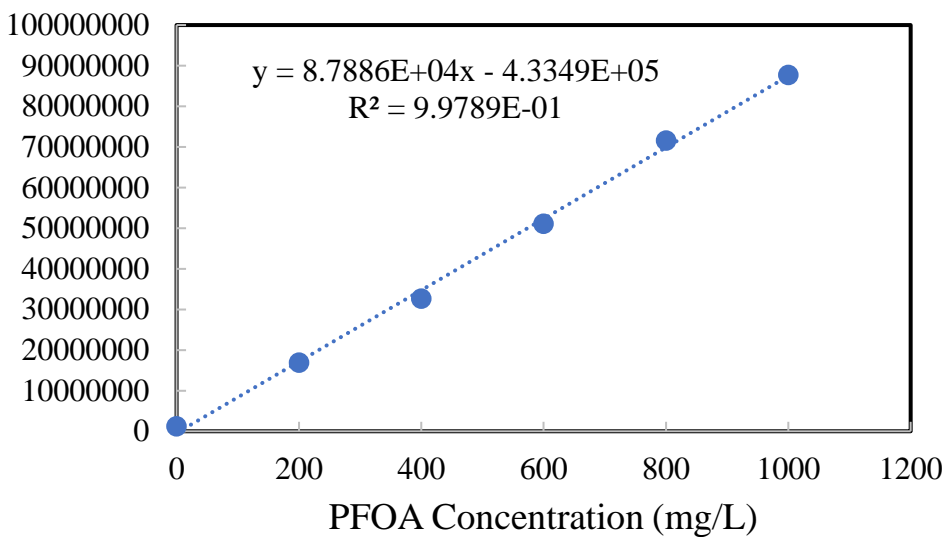

Figure S3. PFOA standard calibration curve for PFOA concentrations up to 1000 ppm using NMR.

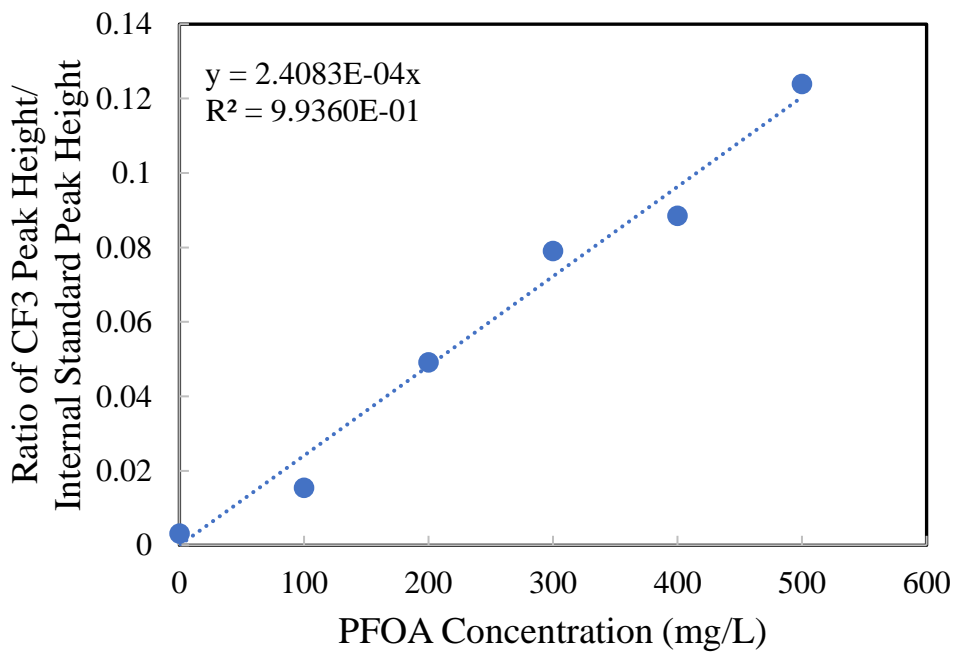

Figure S4. PFOA calibration curve for hexanol samples using NMR.

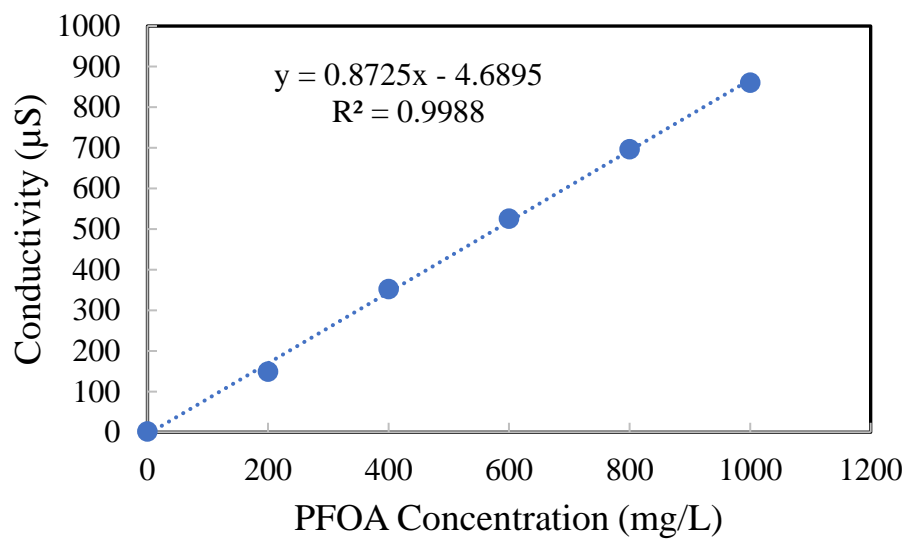

Figure S5. Calibration curve for PFOA in DI water using conductivity.

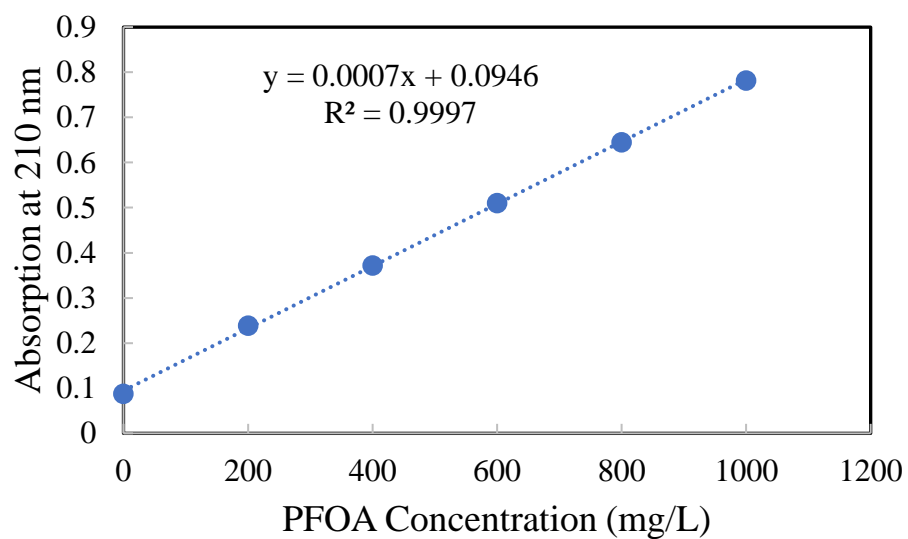

Figure S6. Calibration curve for PFOA in DI water using UV-Vis Spectrometry at 210 nm.

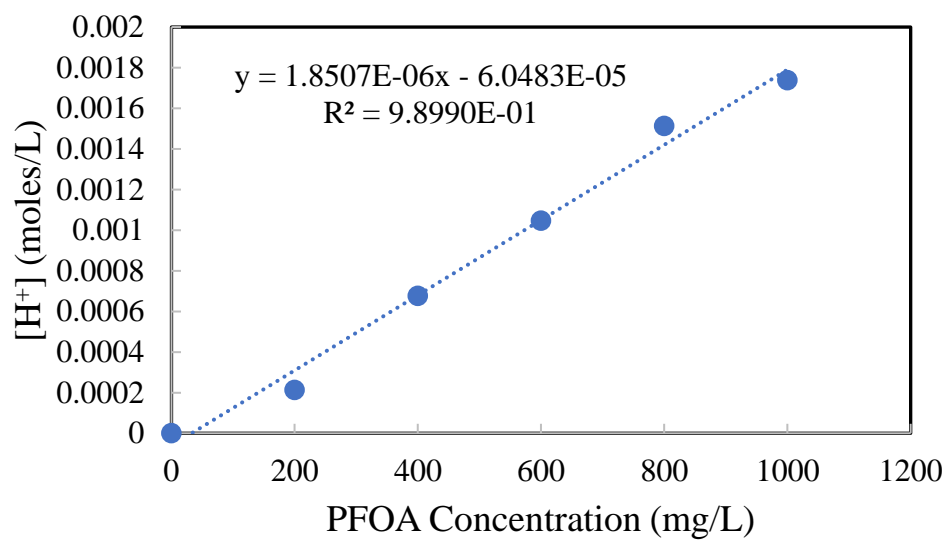

Figure S7. PFOA calibration curve in DI water using pH.
